# Supplementary material for: MicroRNA-148b Targets the TGF-β Pathway to Regulate Angiogenesis and Endothelial-to-Mesenchymal Transition during Skin Wound Healing
Source: PubMed Central journal article supplement (PMC6094488; doi:10.1016/j.ymthe.2018.05.002), 2018-05-08
Supplement: mmc1.pdf [file mmc1.pdf]

YMTHE, Volume 26

## **Supplemental Information**

### **MicroRNA-148b Targets the TGF- $\beta$ Pathway to Regulate Angiogenesis and Endothelial-to- Mesenchymal Transition during Skin Wound Healing**

**Vladislav Miscianinov, Andrea Martello, Lorraine Rose, Elisa Parish, Ben Cathcart, Tijana Mitić, Gillian A. Gray, Marco Meloni, Ayman Al Haj Zen, and Andrea Caporali**

**A**

| #  | Gene Name | Context Score | Conservation Score |
|----|-----------|---------------|--------------------|
| 1. | ROCK1     | -0.226        | 0.963              |
| 2. | SMAD2     | 0.030         | 0.762              |
| 3. | INHBB     | -0.375        | 0.903              |
| 4. | SMURF2    | -0.267        | 0.318              |
| 5. | ACVR1     | -0.237        | 0.634              |
| 6. | ACVR2B    | 0.008         | 0.778              |
| 7. | TGFB2     | -0.279        | 0.885              |
| 8. | LTPB1     | -0.210        | 0.557              |
| 9. | NOG       | -0.292        | 0.501              |

**B**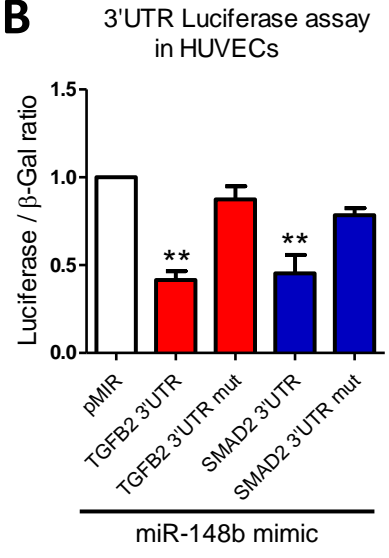**C**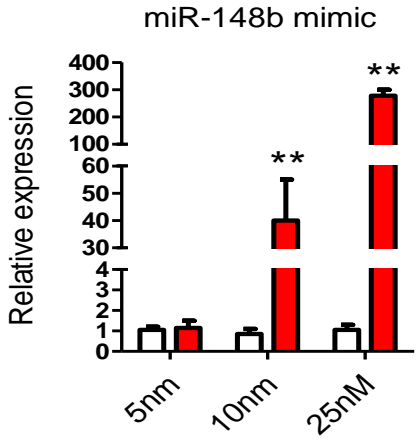**D**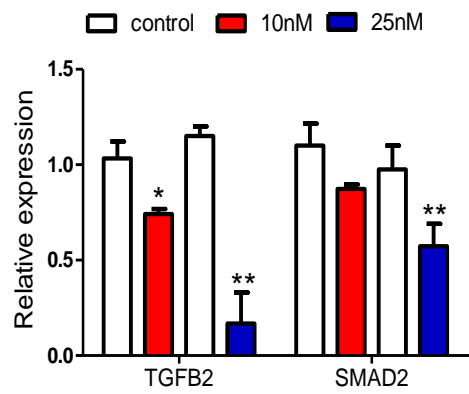**E**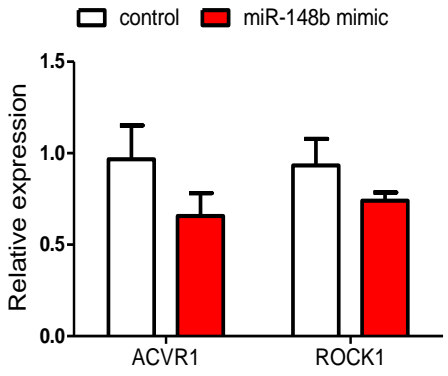**F**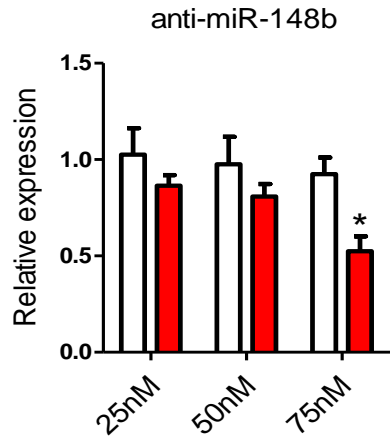

**Figure S1. miR-148b *in silico* targets analysis and miR-148b expression level**

**A.** Analysis of miR-148b target genes using miRpath software. Table shows Context Score and Conservation score from Targetscan. **B.** Luciferase activity at 48h post-co-transfection of HUVECs cells with both miR-148b and the following plasmids: 3'-UTR-TGFB2. 3'-UTR-SMAD2 and pMIR as empty plasmid (n=5); **C.** MiR-148b expression levels after miR mimic transfection (n=5); **D.** TGFB2 and SMAD2 expression after different doses of miR-148b mimic transfection (n=5); **E.** ACVR1 and ROCK1 expression miR-148b mimic transfection (n=5); **F.** MiR-148b expression levels after anti-miR-148b transfection (n=5);. Values are means $\pm$ SEM. \*P<0.05; \*\*P<0.01 vs control. Unpaired two-tailed Student's t-test was applied.

**A**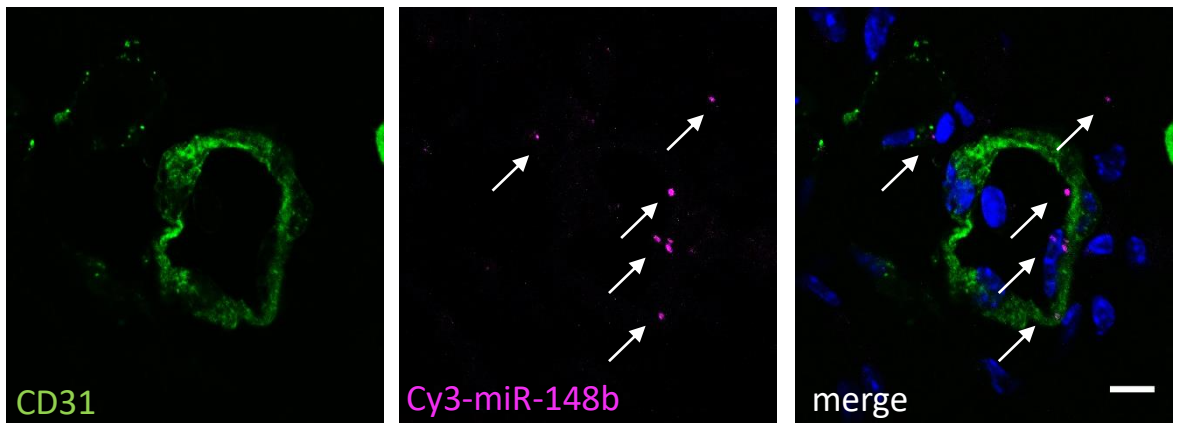**B**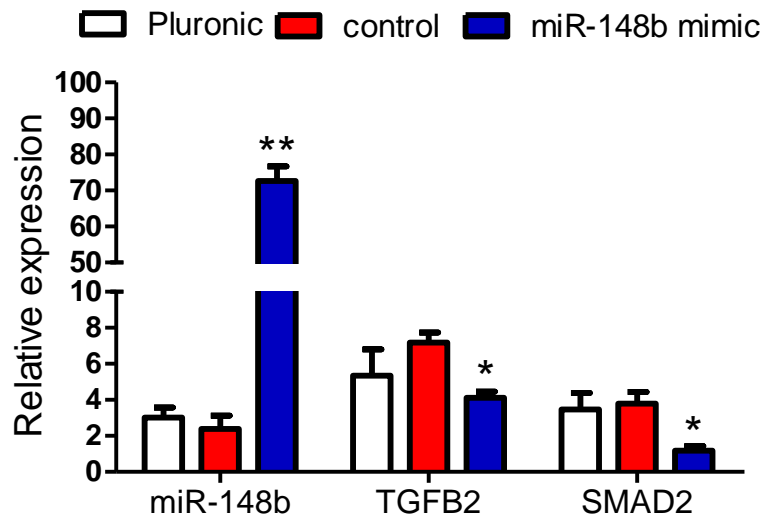**Figure S2: Delivery of miR-148b mimic *in vivo***

**A.** Representative images of the localization of Cy3 labelled miR-148b (pink dots) in skin wounds. Vessels are stained for CD31 (green), scale bar=25 $\mu$ m (magnification 1000x); **B.** Relative gene expression of miR-148b, *TGFB2* and *SMAD2* in dermal wound after delivering of miR-148b mimic or control oligonucleotides at 7 days (n=5); Values are means $\pm$ SEM. \*P<0.05; \*\*P<0.01 vs control or not-wounded skin. Unpaired two-tailed Student's t-test was applied.

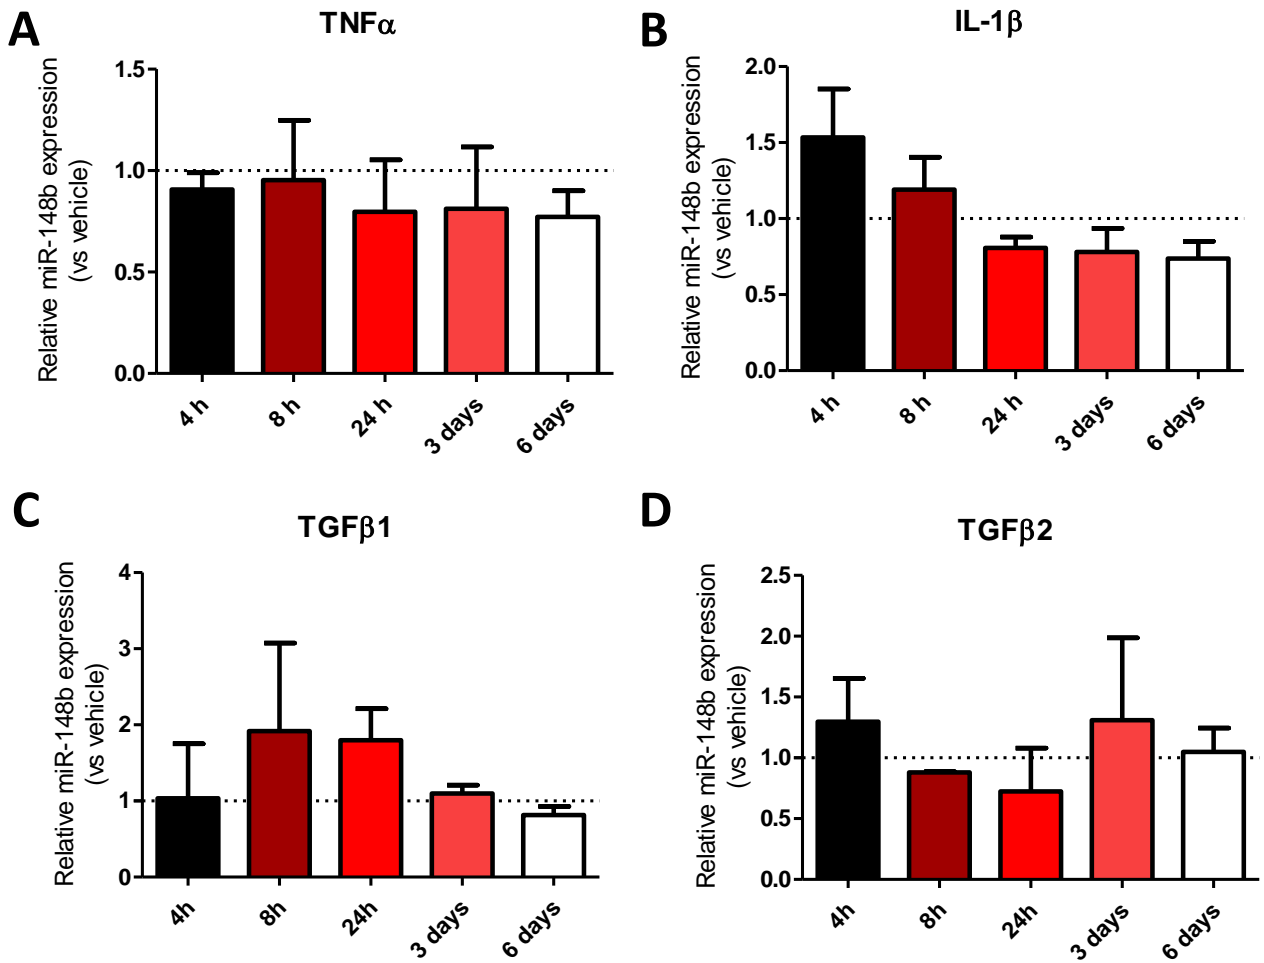

**Figure S3: Regulation of miR-148b expression *in vitro*.** Relative miR-148b expression after treatment of HUVECs with **A.** TNF- $\alpha$ ; **B.** IL-1 $\beta$ ; **C.** TGF $\beta$ 1; **D.** TGF $\beta$ 2; the dotted line represents relative miR-148b expression in the untreated control HUVEC (n=3); Values are means $\pm$ SEM.

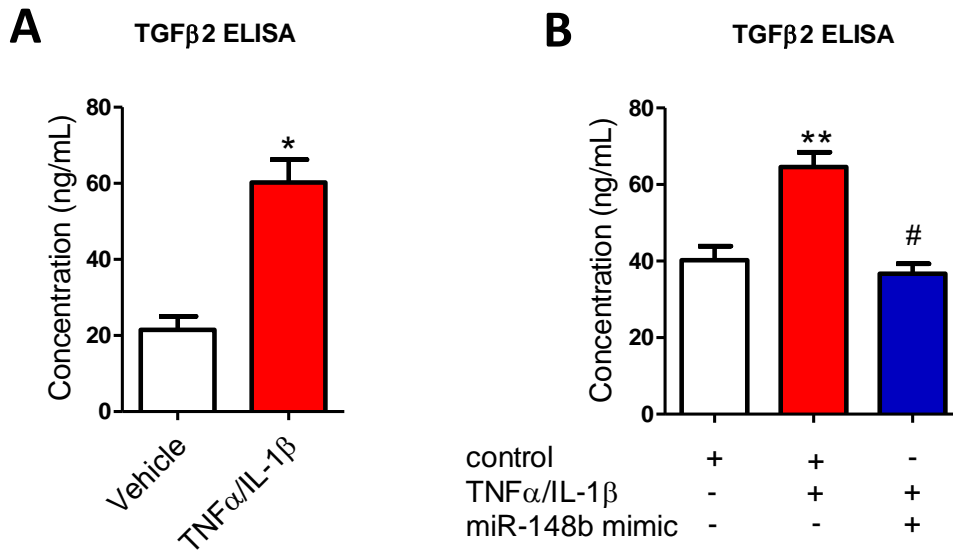

**Figure S4. Secreted TGFβ2 following TNFα/IL-1β treatment and miR-148b mimics transfection.** **A.** Quantification of TGFβ2 ELISA experiment expressed in TGFβ2 concentration (ng/mL) in TNFα/IL-1β treated samples vs the control; **B.** Quantification of TGFβ2 ELISA experiment expressed in TGFβ2 concentration (ng/mL) in miR-148b gain-of-function and/or TNFα/IL-1β treated samples vs the control; Values are means±SEM (n=5). \*P<0.05; \*\*P<0.01 vs control; . #P<0.05 vs TNFα/IL-1β. Unpaired two-tailed Student's t-test and one-way ANOVA statistical test followed by Bonferroni post-hoc analyses were applied.

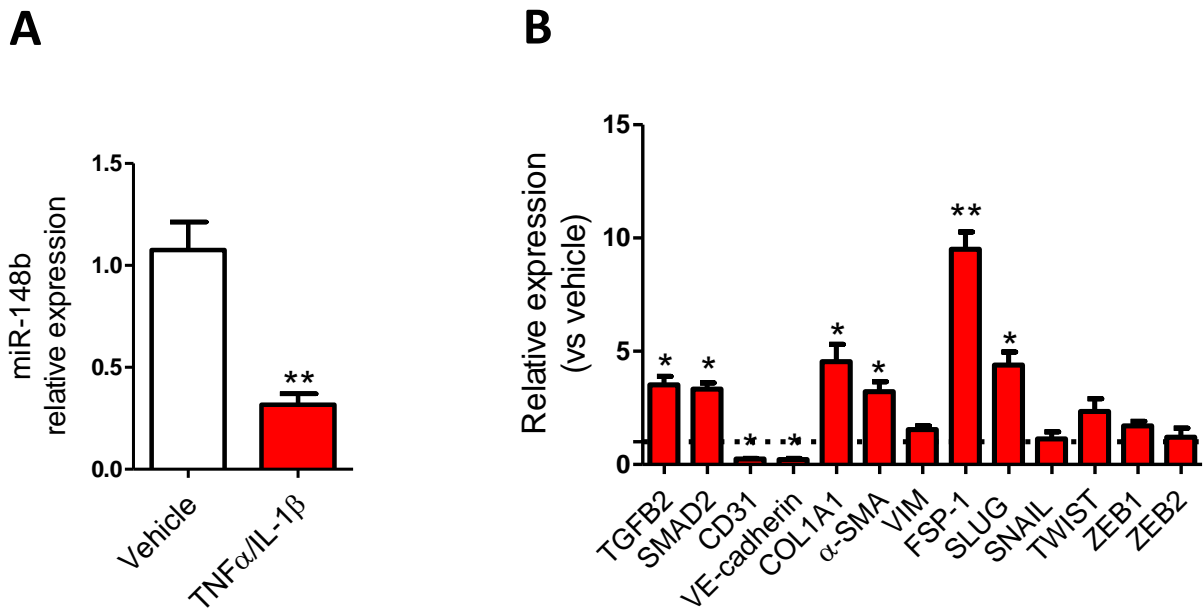

**Figure S5: miR-148b EndMT markers expression in ECs after 14 days of cytokine-treatment.**

**A.** Relative miR-148b expression after treatment of HUVECs treated with TNF $\alpha$ /IL-1 $\beta$  for 14 days; **B.** Relative expression of TGFB2, SMAD2, CD31, VE-cadherin, SNAIL, SLUG, TWIST, ZEB1/2, VIM, FSP-1,  $\alpha$ -SMA and COL1A1; the dotted line represents relative expression in the vehicle-treated HUVECs (n=3); Values are means $\pm$ SEM. \*P<0.05; \*\*P<0.01 vs vehicle. Unpaired two-tailed Student's t-test was applied.

**A**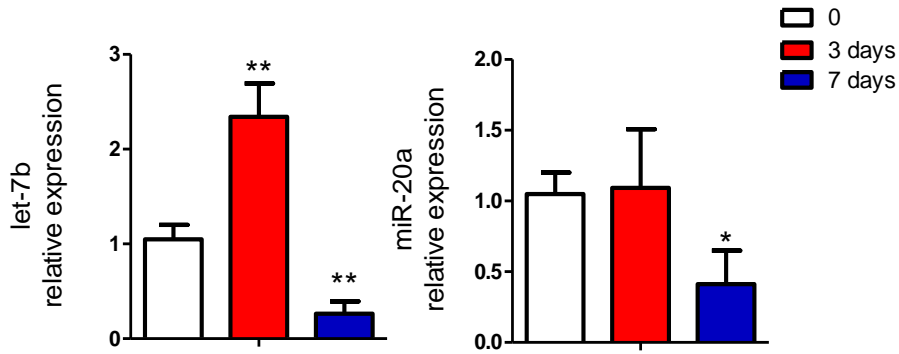**B**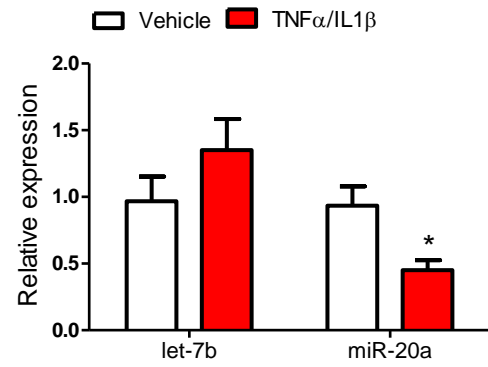

**Figure S6: Regulation of let7b and miR-20a expression *in vitro* and *in vivo*.** **A.** Relative let7-b and miR-20a expression *in vivo* during wound healing progression and **B.** following TNF- $\alpha$ /IL-1 $\beta$  treatment in ECs. Values are means $\pm$ SEM (n=3). \*P<0.05; \*\*P<0.01 vs day 0; . \*P<0.05 vs vehicle. Unpaired two-tailed Student's t-test was applied.

**A**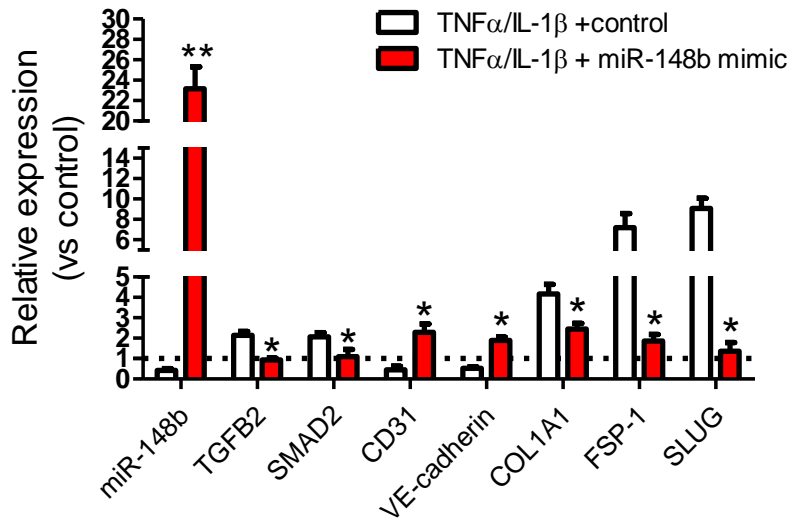**B**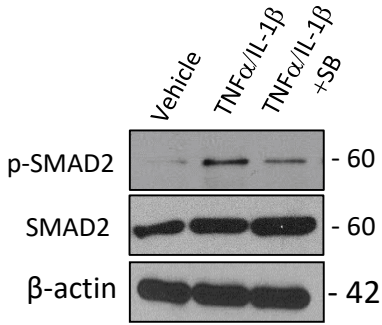**C**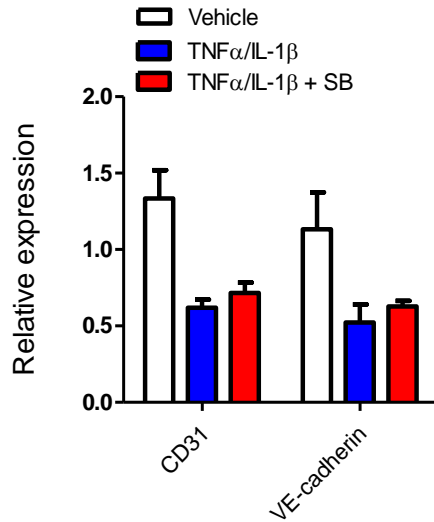**D**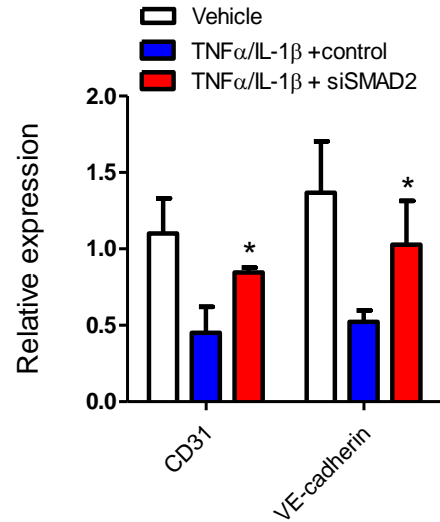

### Figure S7: miR-148b mimics and SMAD2 siRNA regulate cytokine-mediated EndMT

HUVECs were transfected with miR-148b mimic, SMAD2 siRNA or control and treated with TNF- $\alpha$ /IL-1 $\beta$  for 6 days. **A**. Relative expression of miR-148b, TGFB2, SMAD2, CD31, VE-cadherin, COL1A1, FSP-1 and SLUG (n=3); **B**. Western blot for phospho-SMAD2, SMAD2 and  $\beta$ -actin in HUVECs treated with TNF- $\alpha$ /IL-1 $\beta$  and ALK5 inhibitor (SB431542; 10 $\mu$ M) for 6 days. **C**. Relative expression CD31 and VE-Cadherin in HUVECs following treatment with ALK5 inhibitor or **D**. SMAD2 siRNA and/or TNF $\alpha$ /IL-1 $\beta$ ; Values are means $\pm$ SEM (n=3). \*P<0.05; \*\*P<0.01 vs TNF $\alpha$ /IL1 $\beta$  + control oligonucleotides. Unpaired two-tailed Student's t-test was applied.



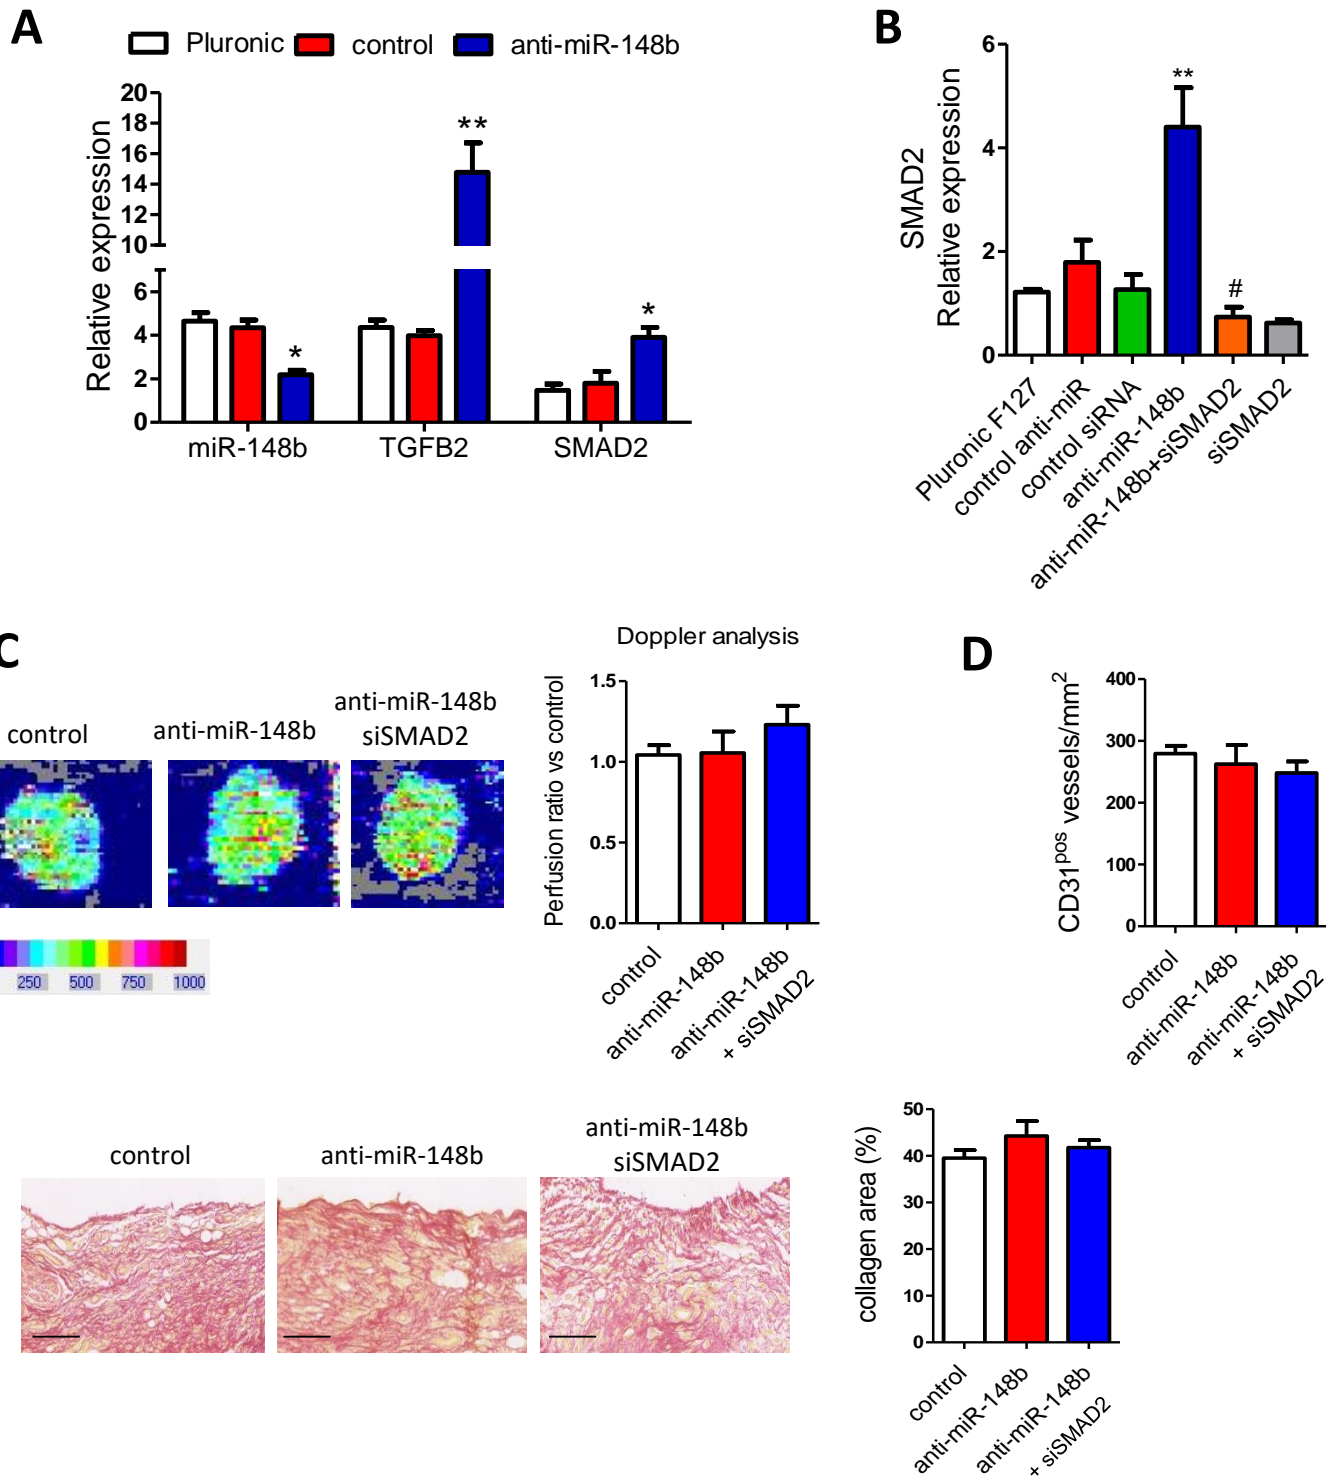

### Figure S8: Analysis of anti-miR-148b delivery *in vivo*

Dermal wounds were treated with control and anti-miR-148b or SMAD2 siRNA at 7 days. **A.** Relative expression of miR-148b, TGFB2 and SMAD2 (n=5); **B.** Relative SMAD2 expression in dermal wounds treated (n=5); **C. left** Representative colour laser Doppler images are taken at 5 days post wounds. **Right.** Chart shows level of wounds perfusion in mice (calculated as the ratio between treated and control blood flow; n=8 per group). **D.** Quantification of vessel density expressed as CD31 positive vessels/mm<sup>2</sup> (n=8); **E. left,** Sirius Red staining of wounds obtained at day 7 post wounding; **right,** Collagen quantification. Scale bar represents 100µm (magnification 200x). Values are means±SEM. \*P<0.05; \*\*P<0.01 vs control; #P<0.05 vs anti-miR-148b. Unpaired two-tailed Student's t-test and one-way ANOVA statistical test followed by Bonferroni post-hoc analyses were applied.
